# Supplementary material
Source: MDPI journal article supplement (https://www.mdpi.com/2313-0105/8/1/1)
Supplement: s1 [file s1]

# Supplementary Information

## Symmetric Aqueous Batteries of Titanium Hexacyanoferrate in $\text{Na}^+$ , $\text{K}^+$ and $\text{Mg}^{2+}$ Media

Min Li <sup>1</sup>, Alessandro Bina <sup>1</sup>, Mariam Maisuradze <sup>1</sup> and Marco Giorgetti <sup>1,\*</sup>

Department of Industrial Chemistry “Toso Montanari”, University of Bologna, Viale Risorgimento 4, 40136  
Bologna, Italy

\* Correspondence: marco.giorgetti@unibo.it ; Tel.: +39-051-2093-666

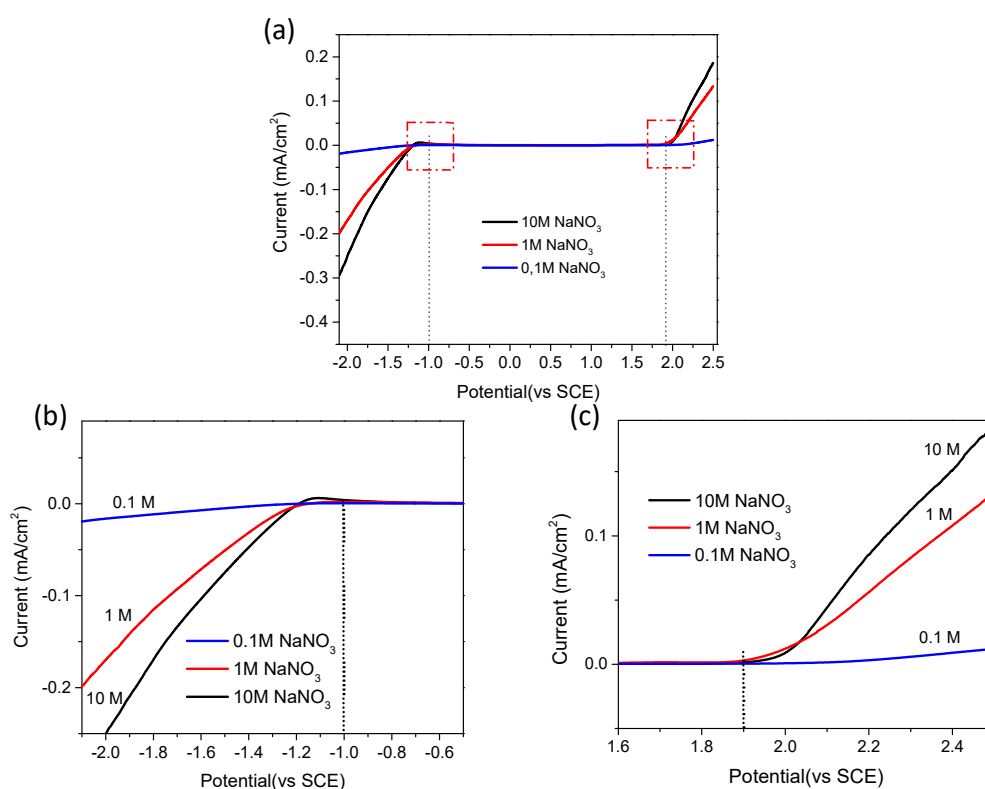

**Figure S1.** Electrochemical stability window of 0.1 M, 1 M and 10 M NaNO<sub>3</sub> electrolytes on Al mesh electrode. **(a)** Overall electrochemical stability window; **(b)** and **(c)** Magnified view of the regions outlined near anodic and cathodic extremes in figure (a).

**Table S1** EIS fitting result with equivalent circuit.

|                   |                |                |              |              |                |
|-------------------|----------------|----------------|--------------|--------------|----------------|
| EIS-<br>Before CV |                |                |              |              |                |
|                   | <u>Element</u> | <u>Freedom</u> | <u>Value</u> | <u>Error</u> | <u>Error %</u> |
|                   | Rs             | Free(+)        | 16.91        | N/A          | N/A            |
|                   | Rct            | Free(+)        | 229.4        | N/A          | N/A            |
|                   | CPE1-T         | Free(+)        | 5.077E-05    | N/A          | N/A            |
|                   | CPE1-P         | Free(+)        | 0.84162      | N/A          | N/A            |
| EIS-<br>After CV  |                |                |              |              |                |
|                   | <u>Element</u> | <u>Freedom</u> | <u>Value</u> | <u>Error</u> | <u>Error %</u> |
|                   | Rs             | Free(+)        | 7.605        | N/A          | N/A            |
|                   | Rct            | Free(+)        | 68.69        | N/A          | N/A            |
|                   | CPE1-T         | Free(+)        | 9.6435E-05   | N/A          | N/A            |
|                   | CPE1-P         | Free(+)        | 0.83481      | N/A          | N/A            |

**Table S2** Diffusion coefficient as obtained by CV testing of TiHCF symmetric cell in 0.1M NaNO<sub>3</sub> electrolyte.

| Peaks                                                        | Peak 1  | Peak 2 | Peak 3  | Peak 4  | Peak 5 | Peak 6  |
|--------------------------------------------------------------|---------|--------|---------|---------|--------|---------|
| Slop                                                         | 0.00513 | 0.0101 | 0.00533 | 0.00472 | 0.0107 | 0.00559 |
| Diffusion coefficient (*10 <sup>-7</sup> cm <sup>2</sup> /s) | 1.44    | 5.59   | 1.56    | 1.22    | 6.27   | 1.71    |
| R <sup>2</sup>                                               | 0.931   | 0.992  | 0.977   | 0.940   | 0.993  | 0.993   |

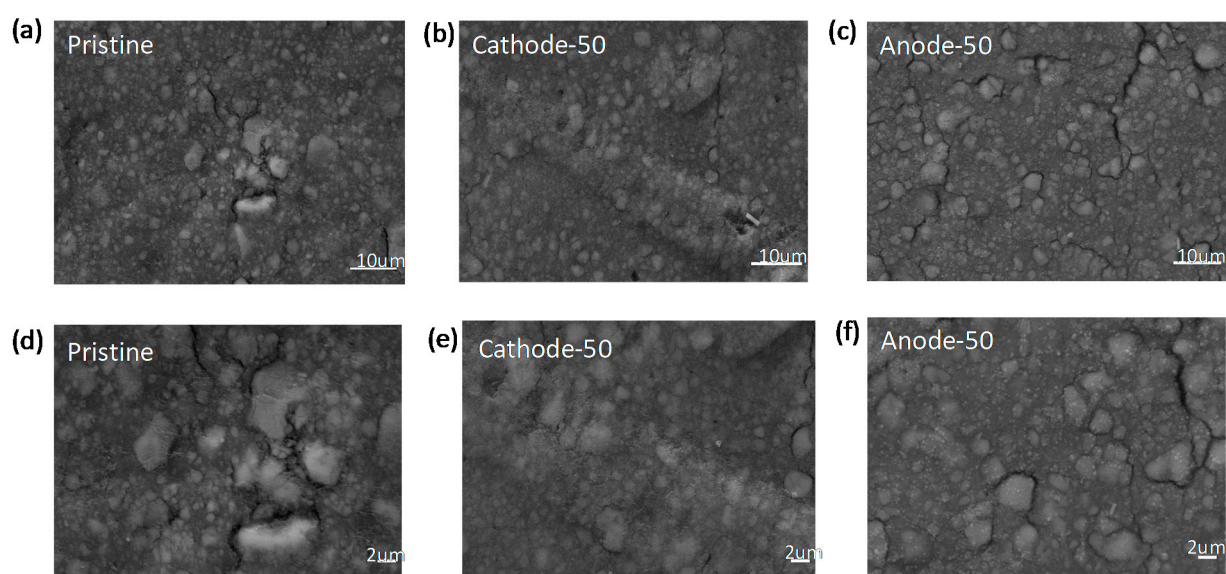**Figure S2.** SEM images of (a, d) pristine electrode; (b, e) Cathode and (c, f) Anode after 50 cycles in 0.1 M NaNO<sub>3</sub> electrolyte.

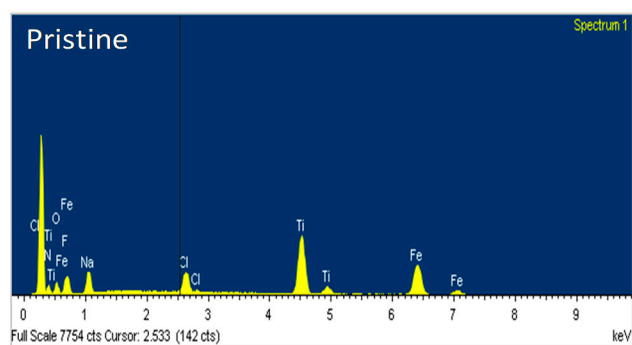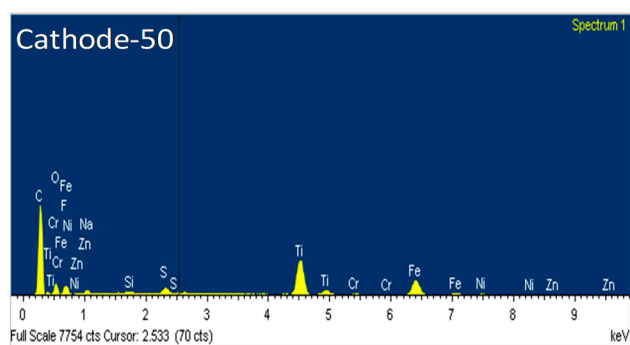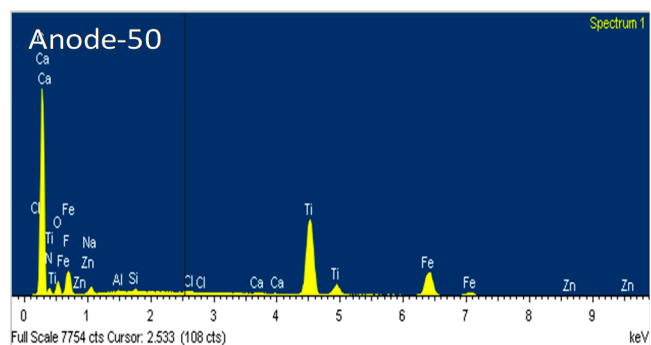

(d)

|                   | Atomic %     |              |              |
|-------------------|--------------|--------------|--------------|
|                   | Ti           | Fe           | Na           |
| <b>Pristine</b>   | <b>14.05</b> | <b>12.58</b> | <b>11.97</b> |
| <b>Cathode-50</b> | <b>3.77</b>  | <b>2.64</b>  | <b>0.39</b>  |
| <b>Anode-50</b>   | <b>3.59</b>  | <b>1.92</b>  | <b>0.41</b>  |

**Figure S3.** EDS analysis of (a) pristine electrode; (b) Cathode and (c) Anode after 50 cycles in 0.1 M NaNO<sub>3</sub> electrolyte; (d) EDS analysis result of Atomic percentage of Ti, Fe and Na.

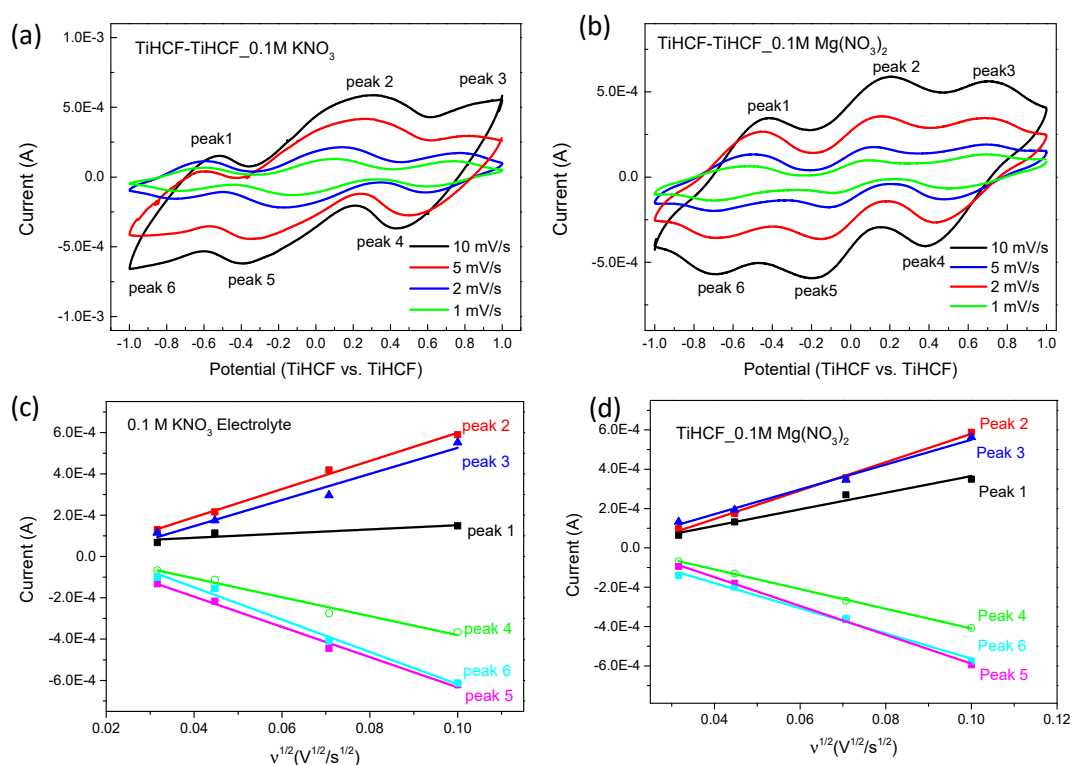

**Figure S4.** (a, b) Electrochemical performances of TiHCF full cell in 0.1 M KNO<sub>3</sub> and 0.1 M Mg(NO<sub>3</sub>)<sub>2</sub> electrolyte at potential range -1.0~1 V; (c, d) relationship between the peak currents (I<sub>p</sub>) and the square root of the scan rate (v<sup>1/2</sup>) in 0.1 M KNO<sub>3</sub> and 0.1 M Mg(NO<sub>3</sub>)<sub>2</sub> electrolyte.

**Table S3** Diffusion coefficient as obtained by CV testing of TiHCF symmetric cell in 0.1 M KNO<sub>3</sub> and 0.1 M Mg (NO<sub>3</sub>)<sub>2</sub> electrolyte.

|        | 0.1M KNO <sub>3</sub> |                                                              |                | 0.1M Mg(NO <sub>3</sub> ) <sub>2</sub> |                                                                |                |
|--------|-----------------------|--------------------------------------------------------------|----------------|----------------------------------------|----------------------------------------------------------------|----------------|
|        | Slop                  | Diffusion coefficient (*10 <sup>-7</sup> cm <sup>2</sup> /s) | R <sup>2</sup> | Slop                                   | Diffusion coefficient t (*10 <sup>-7</sup> cm <sup>2</sup> /s) | R <sup>2</sup> |
| Peak 1 | 0.00101*              | 0.00559                                                      | 0.665          | 0.00432                                | 1.02                                                           | 0.963          |
| Peak 2 | 0.00682               | 2.55                                                         | 0.994          | 0.00722                                | 2.85                                                           | 0.996          |
| Peak 3 | 0.00632               | 2.19                                                         | 0.959          | 0.00632                                | 2.19                                                           | 0.989          |
| Peak 4 | 0.00458               | 1.13                                                         | 0.968          | 0.00500                                | 1.37                                                           | 0.999          |
| Peak 5 | 0.00731               | 2.93                                                         | 0.990          | 0.00733                                | 2.94                                                           | 0.998          |
| Peak 6 | 0.00781               | 3.34                                                         | 0.985          | 0.00641                                | 2.25                                                           | 0.990          |

\* The relationship between peak 1 currents (I<sub>p</sub>) with the square root of the scan rate (v<sup>1/2</sup>) in 0.1 M KNO<sub>3</sub> was not in good linear relationship.
